# Supplementary material for: A risk score model with five long non-coding RNAs for predicting prognosis in gastric cancer: an integrated analysis combining TCGA and GEO datasets
Source: PubMed Central journal article supplement (PMC7879943; doi:10.7717/peerj.10556), 2021-02-09

GSE 62254

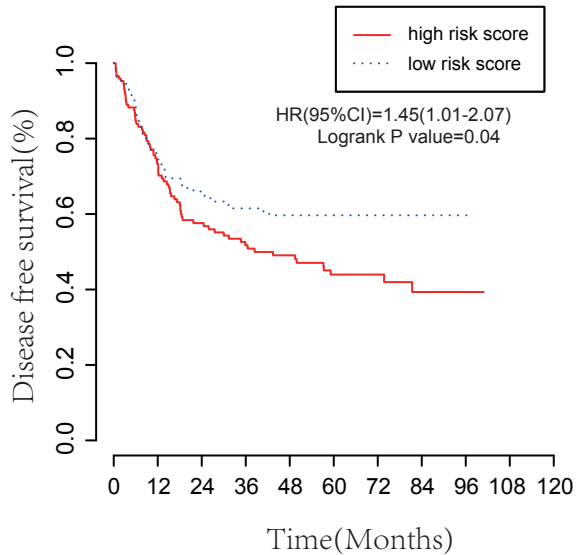

GSE 62254

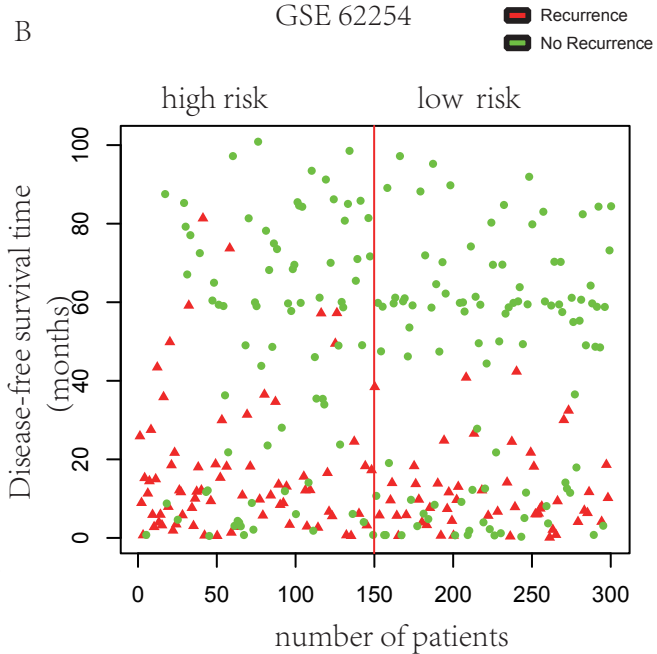

GSE 62254

ROC for 1 year DFS

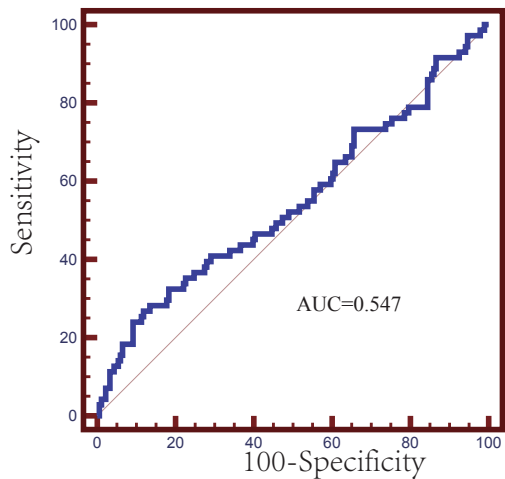

GSE 62254

ROC for 2 year DFS

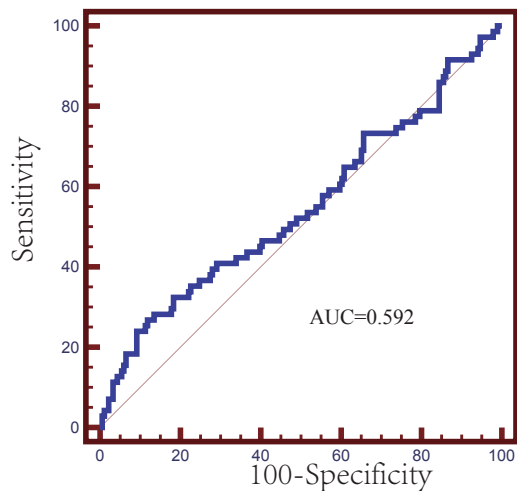

Supplement: peerj-09-10556-s003.pdf [file peerj-09-10556-s003.pdf]
