# Supplementary material for: A risk score model with five long non-coding RNAs for predicting prognosis in gastric cancer: an integrated analysis combining TCGA and GEO datasets
Source: PeerJ. 2021 Feb 9;9:e10556. doi: 10.7717/peerj.10556 (PMC7879943; doi:10.7717/peerj.10556)
Supplement: Supplemental Information 6 — Abbreviations: HR, Hazard ratio; 95%CI, 95% confidence interval. [file peerj-09-10556-s006.xlsx]

## Sheet: Sheet1
				Number (High Risk score/Low Risk score)	HR (95%CI)	P value
		Total		150/150		0.01
		Gender
			Male	88/111	1.30 (0.88, 1.93)	0.2
			Female	62/39	1.97 (1.07, 3.64)	0.03
		Age
			Old (>=50 years old)	121/141	1.39 (0.99, 1.97)	0.06
			Young (<50 years old)	29/9	2.40 (0.71, 8.11)	0.1
		TNM stage
			Stage Ⅰ	7/23	0.88 (0.10, 7.87)	0.9
			Stage Ⅱ	36/60	0.87 (0.42, 1.82)	0.7
			Stage Ⅲ	63/32	1.36 (0.75, 2.48)	0.3
			Stage Ⅳ	44/33	1.16 (0.70, 1.92)	0.6
		Lymphatic invation
			Yes	95/110	1.47 (1.02, 2.12)	0.04
			No	39/34	2.13 (0.87, 5.18)	0.09
